# Supplementary material for: An HDAC9-MALAT1-BRG1 complex mediates smooth muscle dysfunction in thoracic aortic aneurysm
Source: PubMed Central journal article supplement (PMC5843596; doi:10.1038/s41467-018-03394-7), 2018-03-08
Supplement: 41467_2018_3394_MOESM2_ESM.pdf [file 41467_2018_3394_MOESM2_ESM.pdf]

## **Description of Additional Supplementary Files**

**File Name: Supplementary Data 1**

**Description:** Primary data (Fold change and p-values) of genes identified in microarray experiment shown in Figure 1b.

**File Name: Supplementary Data 2**

**Description:** Demography of TAA patients from which aneurysm samples were obtained.

**File Name: Supplementary Data 3**

**Description:** Genes identified in CLIP-Seq experiment shown in Figure 3c.

**File Name: Supplementary Data 4**

**Description:** Ingenuity Pathway analysis of transcripts identified in CLIP-Seq presented in Figure 3c.

**File Name: Supplementary Data 5**

**Description:** Prediction of MALAT1 interaction with proteins using RPISeq program.

**File Name: Supplementary Data 6**

**Description:** Raw data from mouse echocardiograms plotted in Figure 6.

**File Name: Supplementary Data 7**

**Description:** List of materials and reagents used in study including antibodies, primer sequences, probe sequences, and commercial RNAi probes.
